# Carry-over effects of larval microclimate on the transmission potential of a mosquito-borne pathogen

Michelle V. Evans<sup>1,2,3\*</sup>, Justine C. Shiau<sup>4</sup>, Nicole Solano<sup>1,2</sup>, Melinda A. Brindley<sup>4, 5</sup>, John M. Drake<sup>1,2</sup>, Courtney C. Murdock<sup>1,2,3,4,6, 7</sup>

---

1 Odum School of Ecology, University of Georgia, Athens, GA, USA

2 Center for the Ecology of Infectious Diseases, University of Georgia, Athens, GA, USA

3 Center for Tropical Emerging Global Diseases, University of Georgia, Athens, GA, USA

4 Department of Infectious Disease, University of Georgia, Athens, GA, USA

5 Department of Population Health, University of Georgia, Athens, GA, USA

6 Center for Vaccines and Immunology, University of Georgia, Athens, GA, USA

7 River Basin Center, University of Georgia, Athens, GA, USA

\*Corresponding Author: [mvevans@uga.edu](mailto:mvevans@uga.edu)

---

**Abstract** Climate shapes the transmission of mosquito-borne pathogens through impacts on both the vector and the pathogen. In addition to direct effects of the present environment, indirect carry-over effects from previous life history stages can influence mosquito life history traits relevant to disease transmission. While this has been explored in a laboratory setting, the net effect of temperature-mediated carry-over effects due to relevant environmental variation in the larval stage is ambiguous. Here, we use data collected from a semi-field experiment investigating dengue dynamics in *Aedes albopictus* across an urban microclimate gradient and season to parameterize a mechanistic dengue transmission model. We reared *Aedes albopictus* in artificial containers across three replicate sites within three different land classes (rural, suburban, urban), characterized by the low, medium, and high proportions of impervious surface, respectively. We recorded survival to adulthood, immature development rate, and body size daily. Emerged females were offered

a dengue (serotype 2) infectious bloodmeal, kept at a constant 27 C, and assayed for infection, dissemination, and infectiousness twenty-one days post infection. We found that survival and development rate of mosquitoes differed across season, but not land class, driven by a positive relationship of both traits with temperature. Mosquitoes reared on urban land classes and in the fall were more likely to become infected or have disseminated infections, but did not differ in infectiousness across land class or season. Incorporating carry-over effects of larval environment on measures of vector competence resulted in significantly lower predicted dengue transmission potential across land class and season, however predictions both with and without carry-over effects had a strong positive relationship with larval environmental temperature. Given the significant impact of carry-over effects on predicted transmission potential, we suggest that future mechanistic models of disease transmission include both direct and carry-over effects of environmental temperature.

---

## 1 Introduction

Climate plays an important role in the transmission of mosquito-borne pathogens, determining the geographic range of disease vectors and shaping transmission dynamics. Mosquitoes are ectotherms, and are therefore sensitive to environmental temperature, which can drive individual-level variation in character traits relevant to life history and mosquito population dynamics such as feeding rates (Delatte et al., 2009), fecundity (Yang et al., 2009), and survival (Alto and Juliano, 2001). Variation in environmental conditions can also influence traits that are relevant for pathogen transmission, such as vector competence and pathogen development within the mosquito (Lambrechts et al., 2011). However, in addition to the direct effects of the current environment, mosquito phenotype (including fitness) is shaped indirectly by the environmental conditions experienced in previous life history stages, a phenomenon known as carry-over effects (Harrison et al., 2011). Carry-over effects have been documented in a wide-range of species with complex life cycles, such as amphibians (Vonesh, 2005), migratory birds (Norris and Taylor, 2006), and insects (De Block and Stoks, 2005; Roux et al., 2015). Similarly, the mosquito life cycle is characterized by

15 ontogenetic niche shifts, with a larval aquatic stage and an adult terrestrial stage. Based on these  
16 studies, we reason that the thermal environment a mosquito experiences during its larval stage is  
17 likely to have lasting impacts on its adult traits, and, ultimately, on transmission potential.

18 There are several pathways by which carry-over effects from the larval environment might im-  
19 pact key adult traits that are relevant for overall fitness and disease transmission. If the larval  
20 environment is of low quality (e.g. resource scarcity, thermal stress, or crowding), individuals may  
21 experience developmental constraints that negatively impact adult fitness (Inger et al., 2010).  
22 For instance, male *Anopheles gambiae* mosquitoes reared at high-densities in the larval stage are  
23 less competitive mates than those reared at low-densities (Ng'habi et al., 2005), and female *An.*  
24 *stephensii* reared on a low-food diet have lower survival and fecundity than those reared on a  
25 high food diet (Moller-Jacobs et al., 2014; Shapiro et al., 2016). There are numerous studies  
26 demonstrating that variation in larval environmental temperature and nutrients significantly im-  
27 pact adult immune function (Muturi et al., 2012b; Price et al., 2015) and thereby the ability of  
28 adult mosquitoes to transmit arboviruses (e.g. vector competence) (Grimstad and Walker, 1991;  
29 Muturi et al., 2012a, 2011a; Alto and Bettinardi, 2013; Vantaux et al., 2016; Buckner et al.,  
30 2016). A second mechanism shaping carry-over effects can result from acclimation to a specific  
31 larval environment via trait plasticity (Monaghan, 2008). For example, *Culex* mosquitoes reduce  
32 their growth in larval environments with predator cues to avoid size-specific predation (Jourdan  
33 et al., 2016). This, in turn, decreases adult body size, with ramifications for other adults traits  
34 such as fecundity (Lounibos et al., 2002) and susceptibility to pathogens (Paulson and Hawley,  
35 1991).

36 Although it is clear that temperatures at early life stages can significantly alter adult mosquito  
37 traits important for transmission, the net effect of temperature-mediated carry-over effects on  
38 overall transmission potential is ambiguous. Studies focusing solely on vector competence have  
39 found both positive (Muturi et al., 2011c) and negative (Muturi et al., 2011b) relationships be-  
40 tween larval environmental temperature and the proportion of infectious mosquitoes. Additionally,  
41 laboratory studies designed to estimate temperature-mediated carry-over effects are typically con-  
42 ducted across a wide range of temperatures (e.g. with differences of 5 to 10 °C between treatments)

43 not often experienced by mosquitoes in the wild (Cator et al., 2013). While larger treatment differ-  
44 ences increase the likelihood of detecting temperature-mediated carry-over effects on adult traits,  
45 they do not easily “scale-up” to explain transmission across a landscape when incorporated into  
46 temperature-dependent models of mosquito-borne disease (Pascual et al., 2006; Mordecai et al.,  
47 2017; Reiner et al., 2013). Furthermore, temperature-dependent models of mosquito-borne disease  
48 only incorporate direct effects of temperature, despite evidence that indirect carry-over effects can  
49 have large impacts on adult mosquito phenotypes. Thus, the implications of carry-over effects for  
50 mechanistic predictions of vector-borne disease remain unexplored.

51 In light of the above, we hypothesize that relevant environmental variation during the larval  
52 stage will have lasting impacts on adult traits that are relevant for mosquito population dynamics  
53 and pathogen transmission. To assess the implications omitting carry-over effects from mechanistic  
54 transmission models, we used data collected from a semi-field experiment in a the *Aedes albopictus*-  
55 dengue virus (serotype 2, DENV-2) system to parameterize a mechanistic dengue transmission  
56 model. We then compared model predictions when carry-over effects were incorporated relative  
57 to when they were excluded.

## 58 **2 Methods**

### 59 **2.1 Semi-Field Experimental Design**

60 To explore the effects of microclimate variation across an urban landscape, we used an impervious  
61 surface map (National Land Cover Database 2011 (Xian et al., 2011) to select three replicate sites  
62 ( $30m \times 30m$ ) each of low (0-5%), intermediate (6-40%), and high (41-100%) impervious surface.  
63 Percent impervious surface is an accurate predictor of land surface temperature, particularly for  
64 urban landscapes (Yuan and Bauer, 2007), and allowed us to ensure our sites exhibited the full  
65 range of urban microclimates. To select our sites, we calculated the percent impervious surface of  
66 each  $30m \times 30m$  pixel using a moving focal window of  $210m \times 210m$ , as the surrounding impervious  
67 surface can affect the microclimate in the pixel of interest. We then classified each pixel based  
68 on the mean impervious surface within its focal window, with 0 - 5 % representing low, 6 - 40

69 % representing intermediate, and 41 - 100% representing high. Because impervious surface is  
70 an effective classifier of urban land classes (Lu and Weng, 2006), we identified the sites as rural,  
71 suburban, and urban with low, intermediate, and high impervious surface scores, respectively.  
72 Final site selection was constrained by access and permissions, however the final distribution of  
73 sites was chosen to ensure all sites were at least 2 miles from others of the same land class, and  
74 were evenly distributed across the study area (Fig. 1).

75 Within each site, we evenly distributed four plastic trays, each containing 100 first instar  
76 *Ae. albopictus* larvae and 1L of leaf infusion. Leaf infusion was prepared one week prior to the  
77 experiment as described in Murdock et al. (2017). Trays were screened with a fine mesh, placed in  
78 a wire cage to deter wildlife, and placed in full shade. Cages were covered with a clear plastic vinyl  
79 to keep rainwater from entering the trays. We added deionized water to trays after two weeks  
80 to prevent trays from drying up and to maintain a total water volume at 1L. We placed data  
81 loggers (Monarch Instruments: RFID Temperature Track-It logger) in vegetation next to each  
82 tray, approximately 3 feet above the ground, to collect information on the larval microclimate.  
83 Data loggers recorded instantaneous temperature and relative humidity at ten minute intervals  
84 throughout the study period.

85 Sites were visited daily from August 1 to September 3, 2016 and September 26 to November 8,  
86 2016 during the summer and fall replicates, respectively, to collect emerging adult mosquitoes until  
87 all larvae emerged or died. We quantified the number of male and female mosquitoes emerging by  
88 tray per day, mosquito body size, and dengue vector competence (the proportion of mosquitoes  
89 that became infectious with dengue after receiving an artificial blood meal containing dengue  
90 virus). To estimate the effects of land class, microclimate, and season on mosquito population  
91 dynamics and transmission potential (defined as vectorial capacity), we then integrated these data  
92 into models of mosquito population dynamics and vectorial capacity.

## 93 **2.2 Dengue virus *in vitro* culturing and mosquito infections**

94 DENV-2 stock was obtained from the World Reference Center for Emerging Viruses and Ar-  
95 boviruses at the University of Texas Medical Branch (PRS 225 488, originally isolated from human

96 serum in Thailand in 1974 (Vazeille-Falcoz et al., 1999)). We propagated virus by inoculating Vero  
97 (African green monkey kidney epithelial) cells with a low MOI infection. Virus-containing super-  
98 natant was harvested when the cells exhibited more than 80% cytopathic effect. Supernatant was  
99 cleared of cell debris by centrifugation (1000xg, 1 min), aliquoted into cryo-vials, and stored at -80  
100 °C. We quantified viral titers of virus stock using TCID<sub>50</sub> assays, calculated by the Spearman-  
101 Karber method (Shao et al., 2016). When mixed 1:1 with the red blood cell mixture, the final  
102 concentration of virus in the blood meal was  $3.540 \times 10^6$  TCID<sub>50</sub>/mL.

103 Adult mosquitoes were aspirated and aggregated from each tray by day of emergence and site  
104 and stored in reach-in incubators at  $27^{\circ}\text{C} \pm 0.5^{\circ}\text{C}$ ,  $80\% \pm 5\%$  relative humidity, and a 12 h: 12  
105 h light: dark cycle. To ensure infected mosquitoes were of a similar age, mosquitoes were pooled  
106 into cohorts of 4-6 days old in the summer and 4-9 days old in the fall (due to slower and more  
107 asynchronous emergence rates), allowed to mate, and were fed *ad libitum* with a 10% sucrose  
108 solution. The 10% sucrose solution was removed 48 hours prior to the infection and replaced  
109 with deionized water, which was then removed 12-14 hours before infection to encourage higher  
110 feed rates. Infectious blood meals were administered to mosquitoes through a water-jacketed  
111 membrane feeder and consisted of 47% human red blood cells washed in DMEM (vol/vol), 1%  
112 sucrose(weight/vol), 20% FBS (vol/vol), 5 mM ATP, and 33% DMEM medium combined with 1  
113 mL of virus stock (Shan et al., 2016). Blood-fed mosquitoes were then maintained as described  
114 above for the duration of the experiment.

115 For a mosquito to become infectious, arboviruses must pass through multiple tissues (i.e.  
116 midgut and salivary glands) in the mosquito vector that impose significant barriers to infection  
117 (Cheng et al., 2016). Therefore, we assessed mosquitoes for infection, dissemination, and infec-  
118 tiousness through salivation assays and dissections (Hurlbut, 1966; Anderson et al., 2010) 21 days  
119 post infection. Mosquitoes were cold anesthetized and immobilized by removing their legs and  
120 wings. Wings were mounted on a glass slide to measure wing length via a dissecting scope and  
121 micrometer. The proboscis of each female was then inserted into a sterile pipette tip and allowed  
122 to salivate into 10-20  $\mu\text{L}$  of FBS with 3mM ATP and red food coloring on a plate kept at  $27^{\circ}\text{C}$   
123 for 15 minutes, after which the salivation media was expelled into 500  $\mu\text{L}$  of DMEM and stored

124 at -80 °C. After salivation, we removed the head of each individual and stored the body and head  
125 separately at -80 °C.

126 To determine variation in the proportion of mosquitoes that become infected (bodies positive  
127 for virus), disseminated (heads positive for virus), and infectious (saliva positive for virus), we used  
128 cytopathic effect (CPE) assays to test for the presence of virus in each collected tissue (Balaya  
129 et al., 1969). Individual bodies and heads were homogenized in 500 µL of DMEM and centrifuged  
130 at 2,500 rcf for 5 minutes. 200 µL of homogenate was added to Vero cells in a solution of DMEM  
131 (1% pen-strep, 5% FBS by volume) in a 24-well plate and kept at 37 °C and 5 %  $CO_2$ . Salivation  
132 media was thawed, and plated on Vero cells as above. After 5 days, Vero cells were assessed for  
133 presence of DENV-2 via CPE assays. Samples were identified as positive for virus if CPE was  
134 present in the well.

### 135 **2.3 Mosquito body size and intrinsic growth rates ( $r'$ )**

136 We calculated the per capita population growth rate (Equation 1) per tray following Livdahl and  
137 Sugihara (1984):

$$r' = \frac{\ln(\frac{1}{N_0} \sum_x A_x f(\bar{w}_x))}{D + \frac{\sum_x x A_x f(\bar{w}_x)}{\sum_x A_x f(\bar{w}_x)}} \quad (1)$$

138 Where  $N_0$  is the initial number of female mosquitoes (assumed to be 50% of the larvae,  $n=50$ ),  
139  $A_x$  is the number of mosquitoes emerging on day  $x$ ,  $D$  is the time to reproduction following  
140 emergence (assumed to be 14 days (Livdahl and Willey, 1991)), and  $f(\bar{w}_x)$  is fecundity as a  
141 function of mean wing size on day  $x$  ( $w_x$ ; Equation 2). This relationship is assumed to be linear  
142 and calculated via Lounibos et al. (2002):

$$f(\bar{w}_x) = -121.240 + (78.02 \times \bar{w}_x) \quad (2)$$

## 143 2.4 Estimating vectorial capacity

144 We calculated the vectorial capacity ( $VC$ ; Equation 3) for each site and season following Mordecai  
145 et al. (2017):

$$VC(T) = \frac{a(T)^2 b(T) c(T) e^{-\mu(T)/EIR(T)} EFD(T) p_{EA}(T) MDR(T)}{\mu(T)^2} \quad (3)$$

146 Here, mosquito traits are a function of temperature,  $T$ , as described in Table 1.

147 Site-level  $VC$  was calculated using a combination of traits empirically measured in this study  
148 and traits estimated from thermal response models as described in Mordecai et al. (2017). The  
149 bite rate ( $a(T)$ ), adult mosquito mortality rate ( $\mu(T)$ ), and extrinsic incubation rate ( $EIR(T)$ ),  
150 were calculated for mosquitoes at a constant 27 °C using temperature dependent functions from  
151 Mordecai et al. (2017). Vector competence ( $b(T)c(T)$ ) was calculated as the proportion of infec-  
152 tious mosquitoes per site as found by our dengue infection assays. The number of eggs produced  
153 per female per day ( $EFD(T)$ ) was calculated by estimating fecundity from average female wing  
154 length following Eq. 2, and then dividing this by the expected lifespan of mosquitoes ( $1/\mu$ ).  
155 The egg-to-adult survival probability ( $p_{EA}(T)$ ) was defined as the average proportion of adults  
156 emerging at a site. The mosquito immature development rate ( $MDR(T)$ ) was calculated as the  
157 inverse of the mean time to emergence for female mosquitoes per site, resulting in a daily rate  
158 of development. In order to distinguish between vectorial capacity with and without carry-over  
159 effects, we constructed two models. The model without carry-over effects used mathematically  
160 estimated values for  $b(T)c(T)$  and  $F = EFD(T)$  based on thermal response models calculated at  
161 the adult environmental temperature (27 °C) following Mordecai et al. (2017), while the model  
162 incorporating carry-over effects used the empirically estimated values from our study for  $b(T)c(T)$   
163 and  $EFD(T)$ . All other parameters were the same across the two models.

## 164 2.5 Statistical Analysis

165 All analyses were conducted with respect to the female subset of the population, as they are the  
166 subpopulation responsible for disease transmission. In the case of data logger failure, imputed



167 means from the site were used to replace microclimate data. Given the low intra-site variation in  
168 temperature, this assumption allowed us to include mosquito data for those trays without biasing  
169 our microclimate data. In the case of trays failing due to wildlife emptying them (two urban and  
170 one suburban in the fall replicate on experimental days 20, 22, and 20, respectively), collected  
171 mosquitoes were used for infection assays, but were excluded from survival and emergence anal-  
172 yses. Unless otherwise stated, all models included the interaction between predictor variables in  
173 the initial fit, which were dropped based on significance ( $\alpha = 0.05$ ). For all mixed-models, signifi-  
174 cance was assessed through Wald Chi-square tests ( $\alpha = 0.05$ ) and examination of 95% confidence  
175 intervals. Pearson residuals and Q-Q plots were visually inspected for normality. When applica-  
176 ble, pair-wise comparisons within each factor were conducted using Tukey multiple comparisons  
177 of means, adjusting for significance with the Holm-Bonferroni method. All mixed models were fit  
178 using the `lme4`(Bates et al., 2015) package in *R*(R Core Team, 2017).

### 179 **2.5.1 Assessing effects of land class and season on mosquito population dynamics** 180 **and transmission potential**

181 We used generalized linear mixed models to explore if microclimate (i.e. mean, minimum, max-  
182 imum, and daily ranges of temperature and relative humidity), the mean proportion of adult  
183 females emerging per tray, time to female emergence, female body size, the mean mosquito per  
184 capita growth rate, and metrics of vector competence differed across land class and season. Fixed  
185 effects in all initial models included land class, season, and the interaction, before undergoing  
186 model selection based *AICc*. Site was included as a random effect in all models to control for  
187 any variation inherent to the site. The effect of body size on infection dynamics was also explored  
188 at the level of the individual mosquito, fitting a binomial generalized linear mixed effects model  
189 including wing size as a fixed effect and site as a random effect. Finally, because mosquitoes were  
190 pooled across trays within a site to estimate metrics of vector competence (*bc*), the *VC* calculation  
191 was done at the site level. Thus, our analysis of land class and season on *VC* did not require a  
192 random effect, and was tested using a two-way ANOVA.

## 193 **2.5.2 Assessing effects of microclimate on mosquito population dynamics and trans-** 194 **mission potential**

195 To explore whether the effects of land class and season were due to variation in microclimate,  
196 we ran additional statistical analyses exploring the effects of different microclimate variables on  
197 each response variable. In total, we measured seven microclimate variables (mean, minimum, and  
198 maximum temperature; mean, minimum, and maximum relative humidity, and daily temperature  
199 range (DTR)). However, they were all extremely correlated ( $\rho > 0.9$ ) leading us to exclude variables  
200 from our models to reduce bias due to collinearity (Graham, 2003). To identify the microclimate  
201 variable that best explained variation in each of the above response variables, we performed model  
202 selection among seven models that included each microclimate predictor as an individual covariate,  
203 and chose the best performing model based on *AICc*. Thus, we analyzed the effect of the chosen  
204 microclimate variable on the mean proportion of adult females emerging per tray, time to female  
205 emergence, and female body size by fitting linear mixed effects models to each response variable  
206 with site included as a random factor. We were unable to quantify the effect of larval microclimate  
207 on metrics of vector competence at the tray level because mosquitoes were pooled by site to ensure  
208 enough adults were available for infection assays. Instead, we fit linear regressions to each response  
209 variable using the estimated mean daily temperature and relative humidity per site as predictor  
210 variables.

## 211 **3 Results**

212 Of the 3,600 first-instar larvae placed in each season, a total of 2595 and 1128 mosquitoes emerged  
213 in the summer and fall, respectively. A total of 319 female mosquitoes were assessed for infection  
214 status, twenty per site in the summer, and varying numbers per site in the fall due to lower  
215 emergence rates (sample sizes reported in Supp. Table 1). Of this number, a total of 291 wings  
216 were mounted and measured (28 wings were damaged). Of the uninfected mosquitoes, 135 and  
217 162 female wing lengths were measured in the summer and fall replicates, respectively.

### 218 **3.1 Effects of land class and season on microclimate**

219 We found that microclimate profiles differed significantly across both season and land class (results  
220 of significance tests reported in Supp. Table 2). Across all sites, the mean temperature was  $7.73$   
221  $\pm 0.35$  °C higher in the summer than the fall. Urban sites were significantly hotter than both  
222 suburban and rural sites ( $1.26 \pm 0.41$  °C and  $1.68 \pm 0.41$  °C warmer, respectively), however there  
223 was no evidence for a difference between rural and suburban land classes ( $0.422 \pm 0.4$  °C difference  
224 between land classes), a trend that persisted across seasons. The difference in minimum tempera-  
225 tures was similar to that found for mean temperatures, with minimum temperatures  $10.62 \pm 0.69$   
226 °C higher in the summer than the fall. Again, urban sites had a significantly higher minimum  
227 temperature than rural sites ( $2.36 \pm 0.55$  °C warmer). The maximum temperature did not change  
228 significantly with land class (Supp. Table 2), but was significantly different across season, with  
229 summer maximum temperatures  $3.87 \pm 0.64$  °C higher than fall maximum temperatures. This in  
230 turn translated into more variable temperatures in the fall than the summer, with fall mosquitoes  
231 experiencing a mean DTR that was  $6.65 \pm 0.68$  °C higher than summer mosquitoes. DTR also  
232 differed across land class, with rural sites having the largest DTR ( $16.50 \pm 0.708$  °C) compared  
233 to suburban and urban ranges, which were not significantly different from each other.

234 Relative humidity also differed across season and land class (Supp. Fig. 1, Supp. Table 2).  
235 Mean relative humidity was  $12.86 \pm 0.94$  % higher in summer than fall, and was lower at urban  
236 land sites compared to rural and suburban sites within a season (urban:  $78.266 \pm 1.79$  %, rural:  
237  $86.36 \pm 1.79$  %, suburban:  $86.51 \pm 1.79$  %). Similarly, the minimum relative humidity was  $25.78 \pm$   
238  $2.50$  % higher in the summer than the fall. This resulted in a larger daily relative humidity range  
239 (DHR) in the fall compared to the summer (summer:  $26.85 \pm 1.94$  % DHR, fall:  $49.89 \pm 1.74$ %  
240 DHR), and no difference across land class.

### 241 **3.2 Direct effects of land class, season, and microclimate on popula-** 242 **tion growth**

243 The total proportion of adult females emerging per tray was significantly higher in summer than  
244 fall ( $\chi^2 = 71.54.32$ ,  $p < 0.001$ ), but did not differ across land class (Fig. 3A). There was a strong

245 positive relationship between mean daily temperature and larval survival to emergence by tray  
246 (Table 2,  $t = 8.09$ ,  $p < 0.001$ ), a possible explanation for the difference in larval survival between  
247 the summer and fall replicates. The mean rate of larval development per tray (defined as the  
248 inverse of the time to emergence) was significantly different between summer and fall (Fig. 3B,  
249  $\chi^2 = 588.04$ ,  $p < 0.001$ ), with daily development rates of  $0.074 \pm 0.002 \text{ day}^{-1}$  and  $0.0387 \pm 0.002$   
250  $\text{day}^{-1}$ , respectively. Similarly, there was a significant positive relationship between temperature  
251 and larval development rate (Table 2,  $t = 6.89$ ,  $p < 0.001$ ).

### 252 **3.3 Carry-over effects of land class, season, and microclimate on pop-** 253 **ulation growth**

254 We did not observe a significant effect of land class or season on mosquito wing size, with the null  
255 model receiving the lowest  $AICc$ . After incorporating the number of adult females emerging per  
256 day, the date of emergence, and their body size into the per capita growth rate equation (Equation  
257 1), we found that the estimated per capita growth rate was higher in the summer season than the  
258 fall season ( $\chi^2 = 217.58$ ,  $p < 0.001$ ) (Fig. 3C). There was no evidence for a difference in population  
259 growth across land class or temperature.

### 260 **3.4 Carry-over effects of land class, season, and microclimate on vec-** 261 **tor competence**

262 We found that both land class and season did significantly impact the probability of a mosquito  
263 becoming infected and disseminating dengue infection (Fig. 4, Supp. Table 1). In general,  
264 mosquitoes in the fall had a higher probability of infection and dissemination than those in the  
265 summer, and urban mosquitoes had a lower probability of infection than suburban and rural  
266 mosquitoes (Supp. Table 1). The probability of becoming infectious did not differ across land  
267 class, nor season, despite the higher probability of mosquito infection and dissemination in the fall  
268 and on suburban and rural sites. This suggests that the ability of virus to penetrate the salivary  
269 glands differs in adults reared in the summer vs. the fall and across land class, with a higher

270 proportion of dengue infected mosquitoes becoming infectious in the summer and on urban sites  
271 (Supp. Table 1,  $\chi^2 = 13.65$ ,  $p < 0.001$ ). Finally, we also found the probability of infection to  
272 decline with increasing body size ( $z = -2.18$ ,  $p = 0.0289$ ), although there was no evidence for a  
273 relationship between body size and the probability of dissemination or infectiousness.

274 Differences in metrics of vector competence across land class and season were driven by a  
275 strong relationship with microclimate. Across the range of temperatures in our study, we found  
276 that infection and dissemination rates decreased with increasing mean daily temperatures, while  
277 there was no relationship between infectiousness and mean daily temperature (Table 2).

### 278 **3.5 Integrating direct and carry-over effects into estimates of trans-** 279 **mission potential**

280 When calculating  $VC$  without the inclusion of carry-over effects,  $VC$  was higher in the summer  
281 than the fall ( $\chi^2 = 35.84$ ,  $p < 0.001$ ), however this trend disappeared when carry-over effects were  
282 included. In the summer season, there was a trend for  $VC$  to increase with increasing urbanization;  
283 that is, urban sites had higher predicted vectorial capacity than suburban, which had a higher  
284 value than rural. This trend was not significant, however, given the small sample size ( $n=9$ ) and  
285 the disproportional impact of having no infectious mosquitoes at one site, resulting in a value  
286 of  $VC = 0$  for one sample. Further, we found that calculated vectorial capacity increased with  
287 temperature for both models, although the increase was more pronounced when not accounting for  
288 carry-over effects (Fig. 5,  $\beta = 0.77$  and  $\beta = 3.80$  for models with and without carry-over effects,  
289 respectively). When comparing  $VC$  calculations with and without carry-over effects, we found  
290 that including carry-over effects decreased the expected vectorial capacity overall by an average  
291 of  $84.89 \pm 2.86$  %.

## 292 **4 Discussion**

293 Mathematical models of mosquito-borne disease rarely include the larval stage of the life cycle  
294 (Reiner et al., 2013), and of those that do, few include the influence of carry-over effects on

295 important mosquito life-history traits (but see Roux et al. 2015). This is likely due, in part,  
296 to the lack of empirical studies parameterizing the carry-over effects of the larval environment in  
297 mosquito-pathogen systems (Parham et al., 2015), most of which are laboratory studies conducted  
298 across a wider range of temperatures than that seen in the field. Here, we demonstrate that fine-  
299 scale differences in larval microclimate generate carry-over effects on adult vector competence  
300 and fecundity, resulting in variation in mosquito population dynamics and transmission potential  
301 across an urban landscape and across season, driven by differences in microclimate.

302 We found evidence of an urban heat island effect across the landscape of Athens, GA, with  
303 temperatures in urban sites warmer relative to rural and suburban sites, between which there  
304 were no differences. This finding validates our original classification of land classes based on  
305 impervious surface, although it suggests that it is only at intermediate to high levels of impervious  
306 surface ( $> 40\%$ ) that the urban heat island effect manifests. When comparing relative humidity  
307 across land class within a season, warmer urban sites had lower relative humidity than rural  
308 and suburban sites. This is not surprising, as temperature and relative humidity are negatively  
309 correlated, given that warmer air has a lower capacity to hold water. However, we did find  
310 relative humidity to be higher in the summer than the fall. We believe this was caused by a  
311 drought during the fall replicate, during which our study site received no rainfall as compared to  
312 47.50 mm of rainfall during the summer replicate (Georgia Automated Environmental Monitoring  
313 Network, <http://www.georgiaweather.net/>), resulting in lower atmospheric moisture during the  
314 fall replicate.

315 The subtle heterogeneity in microclimate we observed resulted in significantly different pre-  
316 dicted population growth rates through its effects on larval survival, development rates, and female  
317 body size. We found adult female emergence to be higher in the summer than the fall due to a  
318 strong positive relationship with daily mean temperature. Daily mean temperatures ( $25.43\text{ }^{\circ}\text{C}$ )  
319 across all sites in the summer were closer to the predicted thermal optimum of *Ae. albopictus*  
320 for the probability of egg to adult survival ( $p_{EA}$ ;  $24\text{-}25\text{ }^{\circ}\text{C}$ ) (Mordecai et al., 2017) than in the  
321 fall ( $17.69\text{ }^{\circ}\text{C}$ ). While this result contrasts with patterns observed in a previous study on these  
322 field sites that found lower adult emergence in the summer relative to the fall (Murdock et al.,

2017), it is likely due to seasonal differences in microclimate and timing of when these two studies were conducted (summer and fall replicates in June-July and September-October in 2015 versus August-September and September-November in 2016). We also observed more rapid larval development rates (*MDR*) in the summer relative to the fall, and on warmer urban sites in the fall only. Again, this is likely due to the strong positive relationship observed between *MDR* and mean larval temperature, as the metabolic rate of mosquitoes and this trait have been shown to increase with warming temperatures (Delatte et al., 2009; Mordecai et al., 2017). Surprisingly, we found no effect of land class or season on female mosquito body size, in spite of the difference in temperatures across season. Following allometric temperature-size relationships of ectotherms, warmer larval temperatures lead to smaller bodied mosquitoes (Angilleta et al., 2004; Kingsolver and Huey, 2008). Our results are contrary to many laboratory studies that have found cold rearing temperatures result in large bodied mosquitoes (*Ae. albopictus* (Reiskind and Zarrabi, 2012), *Culex tarsalis* (Dodson et al., 2012), *Anopheles gambiae* (Koella and Lyimo, 1996)).

There could be several explanations for why we did not observe an effect of larval environmental temperature on adult body size. Nutrient availability and quality has been shown to mediate the relationship between temperature and body size (Farjana et al., 2011). The majority of the above laboratory studies rear larvae on high quality food sources, such as fish food or liver powder. The leaf infusion used in our experiment relied on yeast and naturally colonizing microorganisms such as bacteria, both of which grow more slowly at low temperatures (Ratkowsky et al., 1982), likely constraining growth of larvae. For example, Lounibos et al. (2002) provided leaf litter as a nutrient source, and found a positive relationship between temperature and male *Ae. albopictus* body size. However, a study in this system in 2015 found a negative relationship between larval temperature and adult *Ae. albopictus* body size (Murdock et al., 2017) when reared on a similar leaf infusion as used in this experiment. There were, however, several key differences between the 2015 study and our study. First, the 2015 study was conducted in July and September rather than August and October, which resulted in cooler temperature profiles for the 2016 study relative to the 2015 study. As with many other mosquito life history traits (Mordecai et al., 2017, 2013), *Ae. albopictus* body mass has a non-linear relationship with temperature across the range of 20 - 30 °C (Mhuri

351 et al., 2011c). Assuming body size scales similarly, the 2016 study would fall nearer the lower  
352 extreme of the thermal function resulting in smaller bodied mosquitoes at colder temperatures.  
353 Second, while we initially provided larvae similar amounts of food as the 2015 study, our larvae  
354 were reared in trays instead of bell jars, which had higher surface to volume ratio and experienced  
355 more evaporation overall. Thus, increased evaporation on warmer sites and during the summer  
356 could concentrate the amount of food provided per larvae over time resulting in larger bodied  
357 mosquitoes with increasing larval temperatures.

358 When larval survival, mosquito development rates, and body size at emergence were combined  
359 into a mosquito population dynamic model, we found significant influences of land class, season,  
360 and microclimate on the per capita growth rate of mosquito populations. Overall, mosquito per  
361 capita growth rates were higher in the summer relative to the fall due to higher adult daily  
362 emergence and more rapid mosquito development rates. Unlike the summer, where land class  
363 did not significantly affect mosquito population growth rates, urban sites were predicted to have  
364 higher population growth rates than suburban and rural sites in the fall due to higher larval  
365 survival and development rates. Other studies have found mosquito population growth rates to  
366 vary with increasing urbanization (Li et al., 2014), deforestation (Afrane et al., 2007), and with  
367 season (Murdock et al., 2017). Our study, however, suggests the effects of microclimate variation  
368 with land class on mosquito population dynamics can be dependent on coarser climactic patterns  
369 such as seasonality.

370 Our results agree with laboratory studies in other arboviral systems (chikungunya (Westbrook  
371 et al., 2010; Adelman et al., 2013), yellow fever (Adelman et al., 2013), and Rift Valley fever (Turell,  
372 1993)) that found cool larval environmental temperatures to enhance arbovirus infection relative  
373 to warmer larval environments. Studies on the *Ae. albopictus*-dengue virus system have also  
374 found that low larval temperatures enhance mosquito susceptibility to virus infection, although  
375 this was dependent on larval nutrition (Buckner et al., 2016) and the stage of the infection (i.e.  
376 mid-gut vs. dissemination vs. saliva) (Alto and Bettinardi, 2013). While we found infection and  
377 dissemination to decrease with increasing temperatures, there was no effect of temperature on viral  
378 presence in the saliva. Our findings suggest that carry over effects due to microclimate variation



379 across land class and season affects the overall efficiency of dengue infections. Thus, even though  
380 a smaller proportion of mosquitoes reared on urban sites and in the summer became infected and  
381 disseminated infection, these mosquitoes were more likely to become infectious. This, in turn,  
382 resulted in no net difference in the proportion of mosquitoes that ultimately become infectious  
383 across land class and season and suggests that later stages of viral infection (i.e. salivary gland  
384 penetration) may be differentially impacted by larval environmental temperature than earlier  
385 stages (i.e. midgut escape).

386 Current statistical and mechanistic models of vector-borne disease prediction focus primarily  
387 on the direct effects of environmental variables on mosquito densities and disease transmission  
388 and rarely include the effects of the larval stage (Mordecai et al. 2017, see Reiner et al. 2015 for  
389 a review of models in the *P. falciparum* system). Even fewer consider the lasting impact of this  
390 stage on adult traits relevant for fitness and disease transmission (Ezeakacha, 2015). We find that  
391 when carry over effects are not incorporated, mechanistic models overestimate the effects of key  
392 environmental drivers (e.g. temperature) on vector-borne disease transmission. The relatively  
393 small differences in temperature across our study site (less than 1.5 °C) resulted in a two-fold  
394 difference in predicted vectorial capacity when omitting carry-over effects. While overall trans-  
395 mission potential still exhibited a positive relationship with increasing temperature, the inclusion  
396 of carry-over effects dampened this effect.

397 Past studies of carry-over effects have been primarily lab based, allowing for detailed study  
398 of the mechanisms of how carry-over effects impact mosquito life history traits (Alto et al., 2008,  
399 2005), but limiting extrapolation to real world conditions. However, many of these studies are con-  
400 ducted across wide environmental gradients at constant temperatures that are not characteristic  
401 of field conditions. Like these laboratory studies, we found carry-over effects to be pervasive, with  
402 important implications for mosquito population dynamics and potential disease transmission, de-  
403 spite the subtle differences in microclimate observed across land class and season. Thus, we would  
404 expect these phenomena to have an even larger impact in more urbanized areas, particularly  
405 megacities, with larger seasonal and spatial microclimate ranges (Peng et al., 2012).

406 Additionally, carry-over effects are not simply limited to microclimate, and have been observed

407 as a result of variation in larval nutrition (Moller-Jacobs et al., 2014), intra- and inter-specific den-  
408 sities (Reiskind and Lounibos, 2009; Alto et al., 2005, 2008), and predation (Roux et al., 2015)  
409 in mosquito systems. Abiotic and biotic factors will likely interact to influence carry over effects  
410 (Buckner et al., 2016; Muturi et al., 2011*a*, 2012*a*; Muturi and Alto, 2011; Muturi et al., 2010),  
411 and how abiotic and biotic factors shape carry-over effects could be scale-dependent. For example,  
412 biotic processes are thought to be more important at local geographic scales, while abiotic pro-  
413 cesses tend to dominate at regional geographic scales in predictive models of species distributions  
414 (Cohen et al., 2016). There is also evidence to suggest that the magnitude of the interaction  
415 between abiotic and biotic processes on carry over effects is scale-dependent (Leisnham et al.,  
416 2014). Future exploration of the scale-dependent contribution of different environmental factors,  
417 their interactions, to carry-over effects is needed to improve models of mosquito distributions,  
418 population dynamics, and disease transmission.

419 In conclusion, we found fine-scale variation in microclimate to shape mosquito population dy-  
420 namics and the transmission potential of mosquito-borne diseases both through direct impacts on  
421 larval survival and development rates, and indirectly through carry-over effects on vector compe-  
422 tence and fecundity. Our study suggests that more empirical work in the lab and field is needed to  
423 better characterize carry over effects associated with relevant environmental drivers. The interac-  
424 tion between the larval and adult environments, mediated by carry-over effects, could have complex  
425 consequences for adult phenotypes and fitness for mosquitoes as well as other organisms. Given  
426 the devastating impact of disease in other species with complex life histories (e.g. chytridiomycosis  
427 in amphibians), the role of carry-over effects in disease transmission may be an important, though  
428 understudied, mechanism that must be better understood to control disease spread. Thus, incor-  
429 porating relationships between carry-over effects and organismal life-history traits into statistical  
430 and mechanistic models will lead to more accurate predictions on the distributions of species,  
431 population dynamics, and the transmission of pathogens and parasites.

## 432 **5 Acknowledgements**

433 We thank members of the Murdock and Brindley labs for discussion and technical support conduct-  
434 ing viral assays. We thank Diana Diaz, Abigail Lecroy, and Marco Notarangelo for assistance in  
435 the field and lab. This work was supported by the University of Georgia (Presidential Fellowship,  
436 College of Veterinary Medicine, Department of Infectious Diseases) the National Science Founda-  
437 tion Graduate Research Fellowship, and the National Science Foundation Research Experiences  
438 for Undergraduates (Grant No. 1156707).

## 439 **6 Contributions**

440 M.V.E, J.M.D, and C.C.M designed the study; M.V.E, J.C.S. and N.S. collected the data; M.V.E.  
441 and M.A.B. cultured virus and conducted CPE assays; M.V.E, J.M.D, and C.C.M analyzed the  
442 data; M.V.E., J.M.D, and C.C.M prepared the tables and figures; M.V.E., J.C.S., N.S., M.A.B.,  
443 J.M.D, and C.C.M drafted the manuscript. All authors gave final approval for publication.

## 444 **7 Data accessibility**

445 All data and code used in analyses are available on figshare (DOI).

## 446 References

- 447 Adelman, Z. N., M. A. E. Anderson, M. R. Wiley, M. G. Murreddu, G. H. Samuel, E. M. Moraz-  
448 zani, and K. M. Myles. 2013. Cooler Temperatures Destabilize RNA Interference and Increase  
449 Susceptibility of Disease Vector Mosquitoes to Viral Infection. *PLOS Neglected Tropical Dis-*  
450 *eases* **7**:e2239.
- 451 Afrane, Y. A., G. Zhou, B. W. Lawson, A. K. Githeko, and G. Yan. 2007. Life-table analysis  
452 of *Anopheles arabiensis* in western Kenya highlands: effects of land covers on larval and adult  
453 survivorship. *The American Journal of Tropical Medicine and Hygiene* **77**:660–666.
- 454 Alto, B. W., and D. Bettinardi. 2013. Temperature and Dengue Virus Infection in Mosquitoes:  
455 Independent Effects on the Immature and Adult Stages. *The American Journal Of Tropical*  
456 *Medicine And Hygiene* **88**:497–505.
- 457 Alto, B. W., and S. A. Juliano. 2001. Temperature Effects on the Dynamics of *Aedes Albopic-*  
458 *tus*(Diptera: Culicidae) Populations in the Laboratory. *J Med Entomol* **38**:548–556.
- 459 Alto, B. W., L. P. Lounibos, S. Higgs, and S. A. Juliano. 2005. Larval Competition Differentially  
460 Affects Arbovirus Infection in *Aedes* Mosquitoes. *Ecology* **86**:3279–3288.
- 461 Alto, B. W., M. H. Reiskind, and L. P. Lounibos. 2008. Size Alters Susceptibility of Vectors to  
462 Dengue Virus Infection and Dissemination. *Am. J. Trop. Med. Hyg.* **79**:688–695.
- 463 Anderson, S. L., S. L. Richards, and C. T. Smartt. 2010. A Simple Method for Determining  
464 Arbovirus Transmission in Mosquitoes. *Journal of the American Mosquito Control Association*  
465 **26**:108–111.
- 466 Angilleta, M. J., T. D. Steury, and M. W. Sears. 2004. Temperature, Growth Rate, and Body Size  
467 in Ectotherms: Fitting Peice of a Life-History Puzzle. *Integrative and Comparative Biology*  
468 **44**:498–509.
- 469 Balaya, S., S. Paul, L. D’Lima, and K. Pavri. 1969. Investigations on an Outbreak of Dengue in  
470 Delhi in 1967. *Indian J. Med. Res.* **57**:767–774.

- 471 Bates, D., M. Mächler, B. Bolker, and S. Walker. 2015. Fitting Linear Mixed-Effects Models  
472 Using lme4. *Journal of Statistical Software* **67**:1–48.
- 473 Buckner, E. A., B. W. Alto, and L. P. Lounibos. 2016. Larval Temperature–Food Effects on Adult  
474 Mosquito Infection and Vertical Transmission of Dengue-1 Virus. *J Med Entomol* **53**:91–98.
- 475 Cator, L. J., S. Thomas, K. P. Paaijmans, S. Ravishankaran, J. A. Justin, M. T. Mathai, A. F.  
476 Read, M. B. Thomas, and A. Eapen. 2013. Characterizing Microclimate in Urban Malaria  
477 Transmission Settings: A Case Study from Chennai, India. *Malaria Journal* **12**:1–1.
- 478 Cheng, G., Y. Liu, P. Wang, and X. Xiao. 2016. Mosquito defense strategies against viral infection.  
479 *Trends in parasitology* **32**:177–186.
- 480 Cohen, J. M., D. J. Civitello, A. J. Brace, E. M. Feichtinger, C. N. Ortega, J. C. Richardson,  
481 E. L. Sauer, X. Liu, and J. R. Rohr. 2016. Spatial Scale Modulates the Strength of Ecological  
482 Processes Driving Disease Distributions. *PNAS* **113**:E3359–E3364.
- 483 De Block, M., and R. Stoks. 2005. Fitness Effects from Egg to Reproduction: Bridging the Life  
484 History Transition. *Ecology* **86**:185–197.
- 485 Delatte, H., G. Gimonneau, A. Triboire, and D. Fontenille. 2009. Influence of Temperature  
486 on Immature Development, Survival, Longevity, Fecundity, and Gonotrophic Cycles of *Aedes*  
487 *Albopictus*, Vector of Chikungunya and Dengue in the Indian Ocean. *J Med Entomol* **46**:33–41.
- 488 Dodson, B. L., L. D. Kramer, and J. L. Rasgon. 2012. Effects of Larval Rearing Temperature on  
489 Immature Development and West Nile Virus Vector Competence of *Culex Tarsalis*. *Parasites &*  
490 *Vectors* **5**:199.
- 491 Ezeakacha, N. F., 2015. Environmental impacts and carry-over effects in complex life cycles: the  
492 role of different life history stages. Ph.D. thesis, University of Southern Mississippi.
- 493 Farjana, T., N. Tuno, and Y. Higa. 2011. Effects of Temperature and Diet on Development  
494 and Interspecies Competition in *Aedes Aegypti* and *Aedes Albopictus*. *Medical and Veterinary*  
495 *Entomology* **26**:210–217.

- 496 Graham, M. H. 2003. Confronting Multicollinearity in Ecological Multiple Regression. *Ecology*  
497 **84**:2809–2815.
- 498 Grimstad, P. R., and E. D. Walker. 1991. *Aedes Triseriatus* (Diptera: Culicidae) and La Crosse  
499 Virus. IV. Nutritional Deprivation of Larvae Affects the Adult Barriers to Infection and Trans-  
500 mission. *J. Med. Entomol.* **28**:378–386.
- 501 Harrison, X. A., J. D. Blount, R. Inger, D. R. Norris, and S. Bearhop. 2011. Carry-over Effects  
502 as Drivers of Fitness Differences in Animals. *J. Anim. Ecol.* **80**:4–18.
- 503 Hurlbut, H. S. 1966. Mosquito salivation and virus transmission. *The American Journal of*  
504 *Tropical Medicine and Hygiene* **15**:989–993.
- 505 Inger, R., X. A. Harrison, G. D. Ruxton, J. Newton, K. Colhoun, G. A. Gudmundsson, G. McEl-  
506 waine, M. Pickford, D. Hodgson, and S. Bearhop. 2010. Carry-over Effects Reveal Reproductive  
507 Costs in a Longdistance Migrant. *J. Anim. Ecol.* **79**:974–982.
- 508 Jourdan, J., J. Baier, R. Riesch, S. Klimpel, B. Streit, R. Mller, and M. Plath. 2016. Adaptive  
509 growth reduction in response to fish kairomones allows mosquito larvae ( *Culex pipiens*) to  
510 reduce predation risk. *Aquatic Sciences* **78**:303–314.
- 511 Kingsolver, J. G., and R. B. Huey. 2008. Size, Temperature, and Fitness: Three Rules. *Evol Ecol*  
512 *Res* **10**:251–268.
- 513 Koella, J. C., and E. O. Lyimo. 1996. Variability in the Relationship between Weight and Wing  
514 Length of *Anopheles Gambiae* (Diptera: Culicidae). *Journal of Medical Entomology* **33**:261–264.
- 515 Lambrechts, L., K. P. Paaijmans, T. Fansiri, L. B. Carrington, L. D. Kramer, M. B. Thomas, and  
516 T. W. Scott. 2011. Impact of Daily Temperature Fluctuations on Dengue Virus Transmission  
517 by *Aedes Aegypti*. *PNAS* **108**:7460–7465.
- 518 Leisnham, P. T., S. L. LaDeau, and S. A. Juliano. 2014. Spatial and Temporal Habitat Segregation  
519 of Mosquitoes in Urban Florida. *PLoS ONE* **9**.

- 520 Li, Y., F. Kamara, G. Zhou, S. Puthiyakunnon, C. Li, Y. Liu, Y. Zhou, L. Yao, G. Yan, and  
521 X.-G. Chen. 2014. Urbanization Increases *Aedes albopictus* Larval Habitats and Accelerates  
522 Mosquito Development and Survivorship. *PLoS Neglected Tropical Diseases* **8**:e3301–12.
- 523 Livdahl, T. P., and G. Sugihara. 1984. Non-Linear Interactions of Populations and the Importance  
524 of Estimating Per Capita Rates of Change. *The Journal of Animal Ecology* **53**:573–580.
- 525 Livdahl, T. P., and M. S. Willey. 1991. Prospects for an Invasion: Competition between *Aedes*  
526 *Albopictus* and Native *Aedes Triseriatus*. *Science* **253**:189–191.
- 527 Lounibos, L. P., S. Suarez, Z. Menendez, N. Nishimura, R. L. Escher, S. M. O’Connell, and J. R.  
528 Rey. 2002. Does Temperature Affect the Outcome of Larval Competition between *Aedes Aegypti*  
529 and *Aedes Albopictus*? *J. of Vec. Eco.* **27**:86–95.
- 530 Lu, D., and Q. Weng. 2006. Use of Impervious Surface in Urban Land-Use Classification. *Remote*  
531 *Sensing of Environment* **102**:146–160.
- 532 Moller-Jacobs, L. L., C. C. Murdock, and M. B. Thomas. 2014. Capacity of Mosquitoes to  
533 Transmit Malaria Depends on Larval Environment. *Parasites & Vectors* **7**:593.
- 534 Monaghan, P. 2008. Early Growth Conditions, Phenotypic Development and Environmental  
535 Change. *Philos. Trans. R. Soc. Lond. B Biol. Sci.* **363**:1635–1645.
- 536 Mordecai, E. A., J. M. Cohen, M. V. Evans, P. Gudapati, L. R. Johnson, C. A. Lippi, K. Miaz-  
537 gowicz, C. C. Murdock, J. R. Rohr, S. J. Ryan, V. Savage, M. S. Shocket, A. S. Ibarra, M. B.  
538 Thomas, and D. P. Weikel. 2017. Detecting the Impact of Temperature on Transmission of  
539 Zika, Dengue, and Chikungunya Using Mechanistic Models. *PLOS Neglected Tropical Diseases*  
540 **11**:e0005568.
- 541 Mordecai, E. A., K. P. Paaijmans, L. R. Johnson, C. Balzer, T. Ben-Horin, E. de Moor, A. McNally,  
542 S. Pawar, S. J. Ryan, T. C. Smith, and K. D. Lafferty. 2013. Optimal Temperature for Malaria  
543 Transmission Is Dramatically Lower than Previously Predicted. *Ecol. Lett.* **16**:22–30.

- 544 Murdock, C. C., M. V. Evans, T. D. McClanahan, K. L. Miazgowicz, and B. Tesla. 2017. Fine-Scale  
545 Variation in Microclimate across an Urban Landscape Shapes Variation in Mosquito Popula-  
546 tion Dynamics and the Potential of *Aedes Albopictus* to Transmit Arboviral Disease. *PLOS*  
547 *Neglected Tropical Diseases* **11**:e0005640.
- 548 Muturi, E. J., and B. W. Alto. 2011. Larval Environmental Temperature and Insecticide Exposure  
549 Alter *Aedes aegypti* Competence for Arboviruses. *Vector-Borne and Zoonotic Diseases* **11**:1157–  
550 1163.
- 551 Muturi, E. J., M. Blackshear, and A. Montgomery. 2012*a*. Temperature and Density-Dependent  
552 Effects of Larval Environment on *Aedes Aegypti* Competence for an Alphavirus. *J. Vector Ecol.*  
553 **37**:154–161.
- 554 Muturi, E. J., K. Costanzo, B. Kesavaraju, and B. W. Alto. 2011*a*. Can Pesticides and Lar-  
555 val Competition Alter Susceptibility of *Aedes* Mosquitoes (Diptera: Culicidae) to Arbovirus  
556 Infection? *Journal of Medical Entomology* **48**:429–436.
- 557 Muturi, E. J., K. Costanzo, B. Kesavaraju, R. Lampman, and B. W. Alto. 2010. Interaction of a  
558 pesticide and larval competition on life history traits of *Culex pipiens*. *Acta Tropica* **116**:141–  
559 146.
- 560 Muturi, E. J., C.-H. Kim, B. W. Alto, M. R. Berenbaum, and M. A. Schuler. 2011*b*. Larval  
561 Environmental Stress Alters *Aedes Aegypti* Competence for Sindbis Virus. *Trop Med Int Health*  
562 **16**:955–964.
- 563 Muturi, E. J., R. Lampman, K. Costanzo, and B. W. Alto. 2011*c*. Effect of Temperature and  
564 Insecticide Stress on Life-History Traits of *Culex Restuans* and *Aedes Albopictus* (Diptera:  
565 Culicidae). *J. Med. Entomol.* **48**:243–250.
- 566 Muturi, E. J., A. Nyakeriga, and M. Blackshear. 2012*b*. Temperature-Mediated Differential  
567 Expression of Immune and Stress-Related Genes in *Aedes Aegypti* Larvae. *Journal of the*  
568 *American Mosquito Control Association* **28**:79–83.



- 569 Nakagawa, S., and H. Schielzeth. 2013. A general and simple method for obtaining R<sup>2</sup> from  
570 generalized linear mixed-effects models. *Methods in Ecology and Evolution* **4**:133–142.
- 571 Ng’habi, K. R., B. John, G. Nkwengulila, B. G. Knols, G. F. Killeen, and H. M. Ferguson.  
572 2005. Effect of Larval Crowding on Mating Competitiveness of *Anopheles Gambiae* Mosquitoes.  
573 *Malaria Journal* **4**:49.
- 574 Norris, D. R., and C. M. Taylor. 2006. Predicting the Consequences of Carry-over Effects for  
575 Migratory Populations. *Biology Letters* **2**:148–151.
- 576 Parham, P. E., J. Waldock, G. K. Christophides, D. Hemming, F. Augusto, K. J. Evans, N. Feffer-  
577 man, H. Gaff, A. Gumel, S. LaDeau, S. Lenhart, R. E. Mickens, E. N. Naumova, R. S. Ostfeld,  
578 P. D. Ready, M. B. Thomas, J. Velasco-Hernandez, and E. Michael. 2015. Climate, Environ-  
579 mental and Socio-Economic Change: Weighing up the Balance in Vector-Borne Disease Trans-  
580 mission. *Philosophical Transactions of the Royal Society B: Biological Sciences* **370**:20130551–  
581 20130551.
- 582 Pascual, M., J. A. Ahumada, L. F. Chaves, X. Rod, and M. Bouma. 2006. Malaria resurgence in  
583 the East African highlands: Temperature trends revisited. *Proceedings of the National Academy  
584 of Sciences of the United States of America* **103**:5829–5834.
- 585 Paulson, S. L., and W. A. Hawley. 1991. Effect of body size on the vector competence of field  
586 and laboratory populations of *Aedes triseriatus* for La Crosse virus. *Journal of the American  
587 Mosquito Control Association* **7**:170–175.
- 588 Peng, S., S. Piao, P. Ciais, P. Friedlingstein, C. Ottle, F.-M. Bréon, H. Nan, L. Zhou, and R. B.  
589 Myneni. 2012. Surface Urban Heat Island Across 419 Global Big Cities. *Environ. Sci. Technol.*  
590 **46**:696–703.
- 591 Price, D. P., F. D. Schilkey, A. Ulanov, and I. A. Hansen. 2015. Small Mosquitoes, Large  
592 Implications: Crowding and Starvation Affects Gene Expression and Nutrient Accumulation in  
593 *Aedes Aegypti*. *Parasites & Vectors* **8**:252.

- 594 R Core Team, 2017. R: A Language and Environment for Statistical Computing. R Foundation  
595 for Statistical Computing, Vienna, Austria.
- 596 Ratkowsky, D. A., J. Olley, T. A. McMeekin, and A. Ball. 1982. Relationship between Temperature  
597 and Growth Rate of Bacterial Cultures. *J. Bacteriol.* **149**:1–5.
- 598 Reiner, R. C., M. Geary, P. M. Atkinson, D. L. Smith, and P. W. Gething. 2015. Seasonality of  
599 Plasmodium Falciparum Transmission: A Systematic Review. *Malar. J.* **14**.
- 600 Reiner, R. C., T. A. Perkins, C. M. Barker, T. Niu, L. F. Chaves, A. M. Ellis, D. B. George,  
601 A. L. Menach, J. R. C. Pulliam, D. Bisanzio, C. Buckee, C. Chiyaka, D. A. T. Cummings, A. J.  
602 Garcia, M. L. Gatton, P. W. Gething, D. M. Hartley, G. Johnston, E. Y. Klein, E. Michael,  
603 S. W. Lindsay, A. L. Lloyd, D. M. Pigott, W. K. Reisen, N. Ruktanonchai, B. K. Singh, A. J.  
604 Tatem, U. Kitron, S. I. Hay, T. W. Scott, and D. L. Smith. 2013. A Systematic Review  
605 of Mathematical Models of Mosquito-Borne Pathogen Transmission: 1970–2010. *J. R. Soc.  
606 Interface* **10**:20120921.
- 607 Reiskind, M. H., and L. P. Lounibos. 2009. Effects of Intraspecific Larval Competition on Adult  
608 Longevity in the Mosquitoes *Aedes Aegypti* and *Aedes Albopictus*. *Med. Vet. Entomol.* **23**:62–  
609 68.
- 610 Reiskind, M. H., and A. A. Zarrabi. 2012. Is Bigger Really Bigger? Differential Responses to  
611 Temperature in Measures of Body Size of the Mosquito, *Aedes Albopictus*. *Journal of Insect  
612 Physiology* **58**:911–917.
- 613 Roux, O., A. Vantaux, B. Roche, K. B. Yameogo, K. R. Dabiré, A. Diabaté, F. Simard, and  
614 T. Lefèvre. 2015. Evidence for Carry-over Effects of Predator Exposure on Pathogen Transmis-  
615 sion Potential. *Proc. R. Soc. B* **282**:20152430.
- 616 Shan, C., X. Xie, A. E. Muruato, S. L. Rossi, C. M. Roundy, S. R. Azar, Y. Yang, R. B. Tesh,  
617 N. Bourne, A. D. Barrett, N. Vasilakis, S. C. Weaver, and P.-Y. Shi. 2016. An Infectious cDNA  
618 Clone of Zika Virus to Study Viral Virulence, Mosquito Transmission, and Antiviral Inhibitors.  
619 *Cell Host and Microbe* pages 1–23.

- 620 Shao, Q., S. Herrlinger, S.-L. Yang, F. Lai, J. M. Moore, M. A. Brindley, and J.-F. Chen. 2016. Zika  
621 Virus Infection Disrupts Neurovascular Development and Results in Postnatal Microcephaly  
622 with Brain Damage. *Development* **143**:4127–4136.
- 623 Shapiro, L. L. M., C. C. Murdock, G. R. Jacobs, R. J. Thomas, and M. B. Thomas. 2016. Larval  
624 Food Quantity Affects the Capacity of Adult Mosquitoes to Transmit Human Malaria. *Proc. B*  
625 **283**:20160298–8.
- 626 Turell, M. 1993. Effect of Environmental Temperature on the Vector Competence of *Aedes*  
627 *Taeniorhynchus* for Rift Valley Fever and Venezuelan Equine Encephalitis Viruses. *Am. J.*  
628 *Trop. Med. Hyg.* **49**:672–676.
- 629 Vantaux, A., T. Lefèvre, A. Cohuet, K. R. Dabiré, B. Roche, and O. Roux. 2016. Larval Nutritional  
630 Stress Affects Vector Life History Traits and Human Malaria Transmission. *Sci. Rep.* **6**:1–10.
- 631 Vazeille-Falcoz, M., L. Mousson, F. Rodhain, E. Chungue, and A. B. Failloux. 1999. Variation in  
632 oral susceptibility to dengue type 2 virus of populations of *Aedes aegypti* from the islands of  
633 Tahiti and Moorea, French Polynesia. *The American Journal of Tropical Medicine and Hygiene*  
634 **60**:292–299.
- 635 Vonesh, J. R. 2005. Sequential Predator Effects across Three Life Stages of the African Tree Frog,  
636 *Hyperolius Spinigularis*. *Oecologia* **143**:280–290.
- 637 Westbrook, C. J., M. H. Reiskind, K. N. Pesko, K. E. Greene, and L. P. Lounibos. 2010. Lar-  
638 val Environmental Temperature and the Susceptibility of *Aedes Albopictus* Skuse (Diptera:  
639 Culicidae) to Chikungunya Virus. *Vector-Borne and Zoonotic Diseases* **10**:241–247.
- 640 Xian, G., C. Homer, J. Dewitz, J. Fry, N. Hossain, and J. Wickham. 2011. Change of impervious  
641 surface area between 2001 and 2006 in the conterminous United States. *Photogrammetric*  
642 *Engineering and Remote Sensing* **77**:758–762.
- 643 Yang, H. M., M. L. G. Macoris, K. C. Galvani, M. T. M. Andrighetti, and D. M. V. Wanderley.  
644 2009. Assessing the Effects of Temperature on the Population of *Aedes Aegypti*, the Vector of  
645 Dengue. *Epidemiol. Infect.* **137**:1188–1202.

646 Yuan, F., and M. E. Bauer. 2007. Comparison of Impervious Surface Area and Normalized  
647 Difference Vegetation Index as Indicators of Surface Urban Heat Island Effects in Landsat  
648 Imagery. *Remote Sens. Environ.* **106**:375–386.

649 **List of Figures**

|     |   |                                                                                        |    |
|-----|---|----------------------------------------------------------------------------------------|----|
| 650 | 1 | Map of study sites in Athens, GA, with inset illustrating location of Athens-Clarke    |    |
| 651 |   | County (black outline) in the state of Georgia. Symbols represent land classes         |    |
| 652 |   | (square: rural, circle:suburban, triangle: urban). Colors represent the amount of      |    |
| 653 |   | impervious surface within the 210m focal area of each pixel, as illustrated on the     |    |
| 654 |   | color bar on the bottom. . . . .                                                       | 30 |
| 655 | 2 | Microclimate differed significantly across both season and land class. Date ranges     |    |
| 656 |   | with green and orange background represent the summer and fall trials, respectively.   |    |
| 657 |   | The solid line represents the mean temperature across trays in each land class. The    |    |
| 658 |   | dotted lines represent the mean minimum and maximum temperatures across trays          |    |
| 659 |   | in each land class. . . . .                                                            | 31 |
| 660 | 3 | Female larval a) survival rate, b) development rate and c) population growth rate      |    |
| 661 |   | across the summer and fall trials and three land classes. . . . .                      | 32 |
| 662 | 4 | Infection dynamics (infected, disseminated, and infectious mosquitoes) across land     |    |
| 663 |   | class and season. Bars represent mean and standard errors of raw data across sites     |    |
| 664 |   | (n=3 per treatment). . . . .                                                           | 33 |
| 665 | 5 | The calculated vectorial capacity by site across individual mean temperature prior     |    |
| 666 |   | to infection assays (a). The incorporation of carry-over effects reduces the expected  |    |
| 667 |   | vectorial capacity at sites, although the effect is lessened at cooler temperatures.   |    |
| 668 |   | Inset charts on the right indicate calculated vectorial capacity without carry-over    |    |
| 669 |   | effects (b), with carry-over effects (c), and the percent difference due to the incor- |    |
| 670 |   | poration of carry-over effects (d). Error bars represent standard error. . . . .       | 34 |
| 671 | 6 | Supplementary Figure 1. Relative humidity across both replicates. . . . .              | 35 |

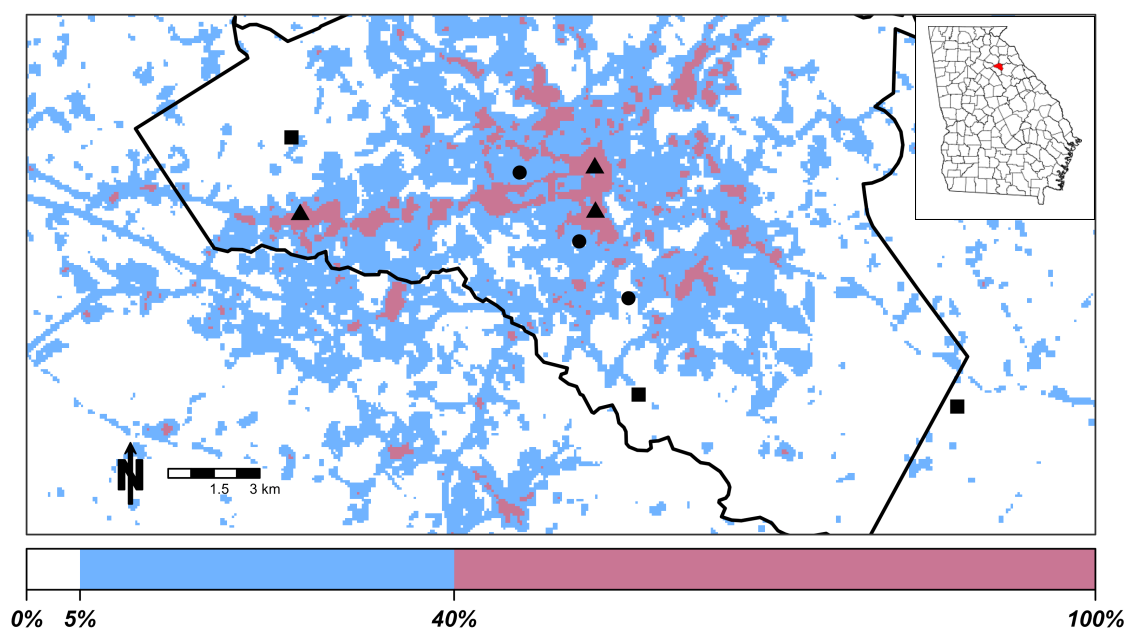

Figure 1: Map of study sites in Athens, GA, with inset illustrating location of Athens-Clarke County (black outline) in the state of Georgia. Symbols represent land classes (square: rural, circle:suburban, triangle: urban). Colors represent the amount of impervious surface within the 210m focal area of each pixel, as illustrated on the color bar on the bottom.

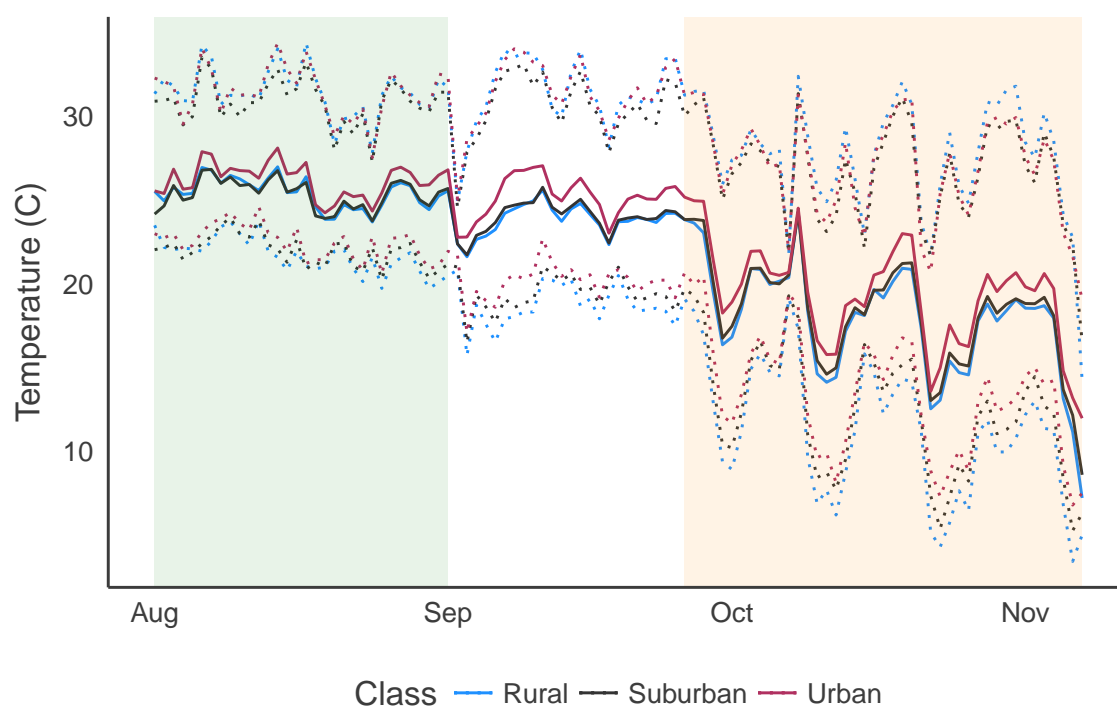

Figure 2: Microclimate differed significantly across both season and land class. Date ranges with green and orange background represent the summer and fall trials, respectively. The solid line represents the mean temperature across trays in each land class. The dotted lines represent the mean minimum and maximum temperatures across trays in each land class.

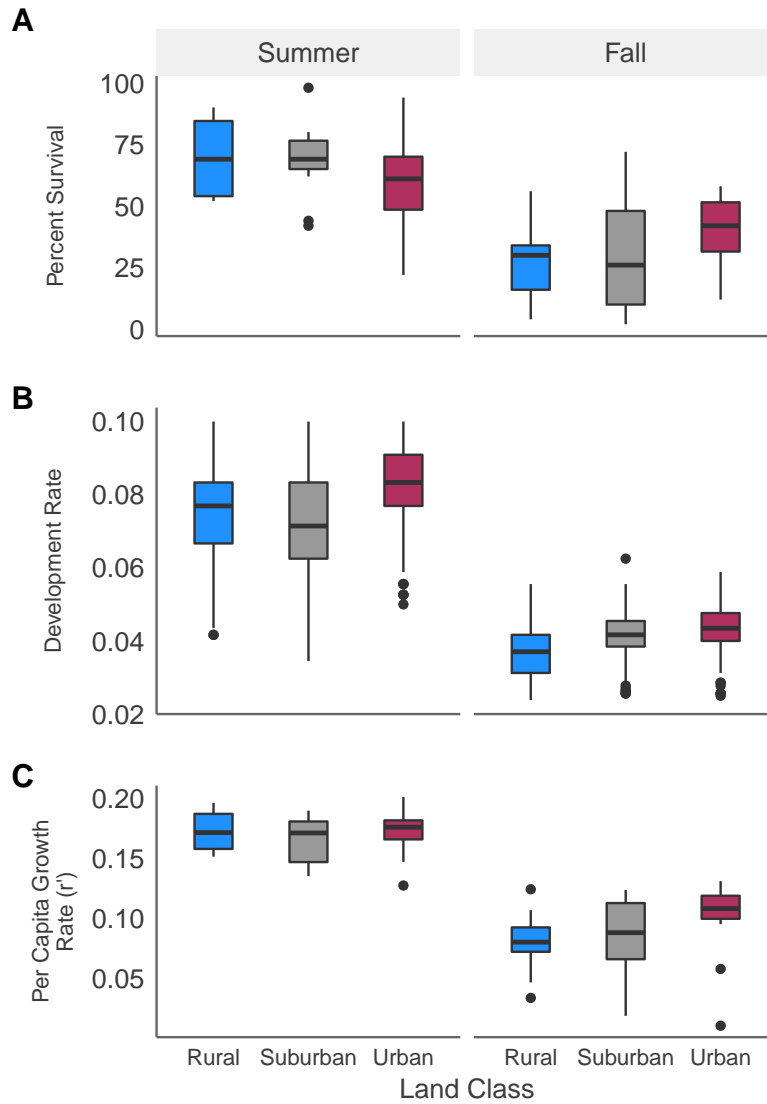

Figure 3: Female larval a) survival rate, b) development rate and c) population growth rate across the summer and fall trials and three land classes.



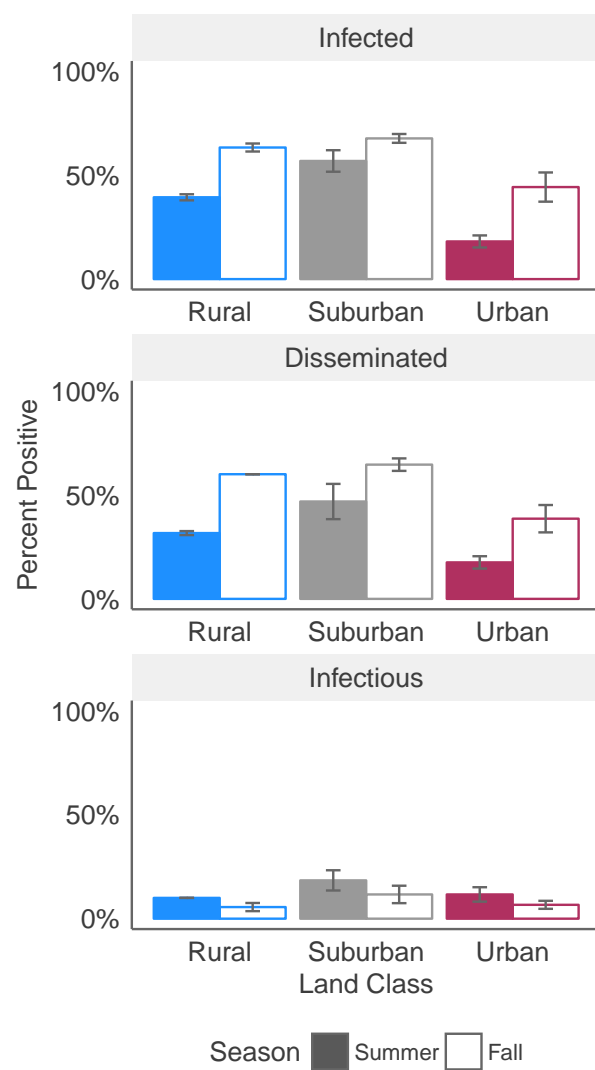

Figure 4: Infection dynamics (infected, disseminated, and infectious mosquitoes) across land class and season. Bars represent mean and standard errors of raw data across sites (n=3 per treatment).

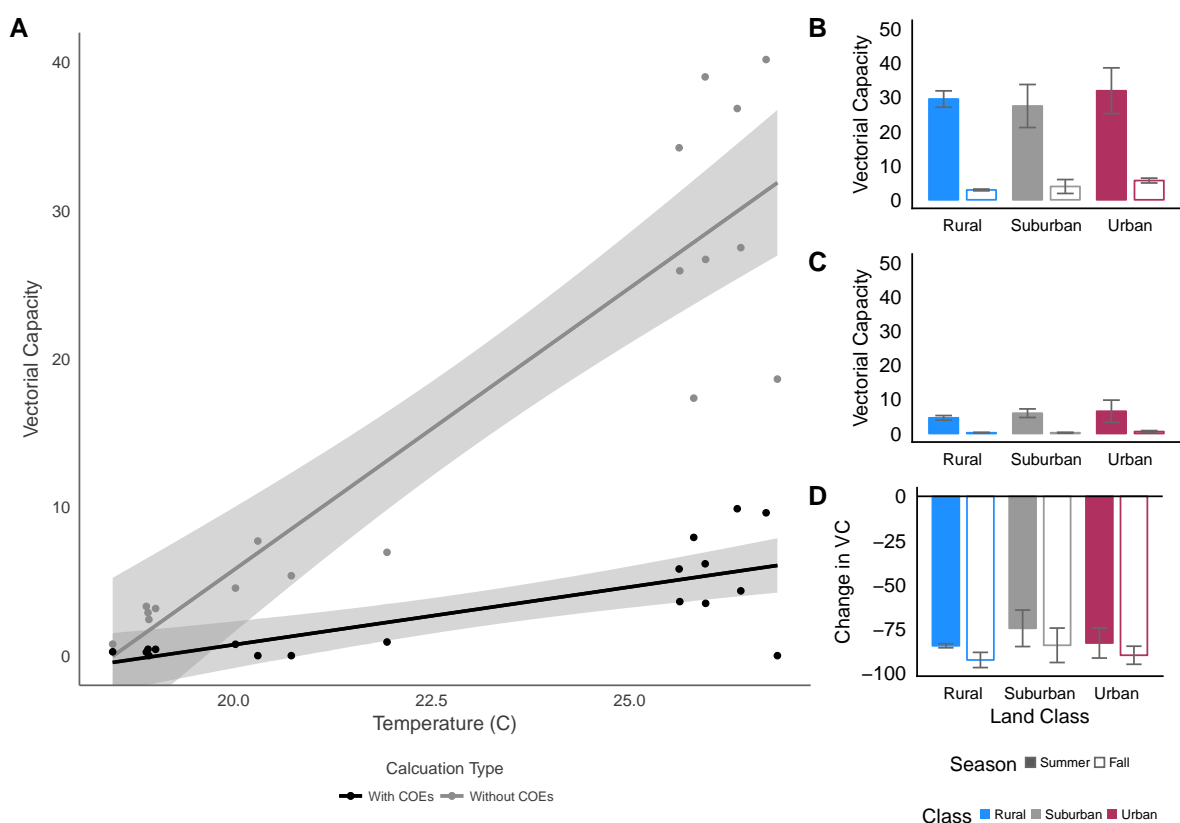

Figure 5: The calculated vectorial capacity by site across individual mean temperature prior to infection assays (a). The incorporation of carry-over effects reduces the expected vectorial capacity at sites, although the effect is lessened at cooler temperatures. Inset charts on the right indicate calculated vectorial capacity without carry-over effects (b), with carry-over effects (c), and the percent difference due to the incorporation of carry-over effects (d). Error bars represent standard error.

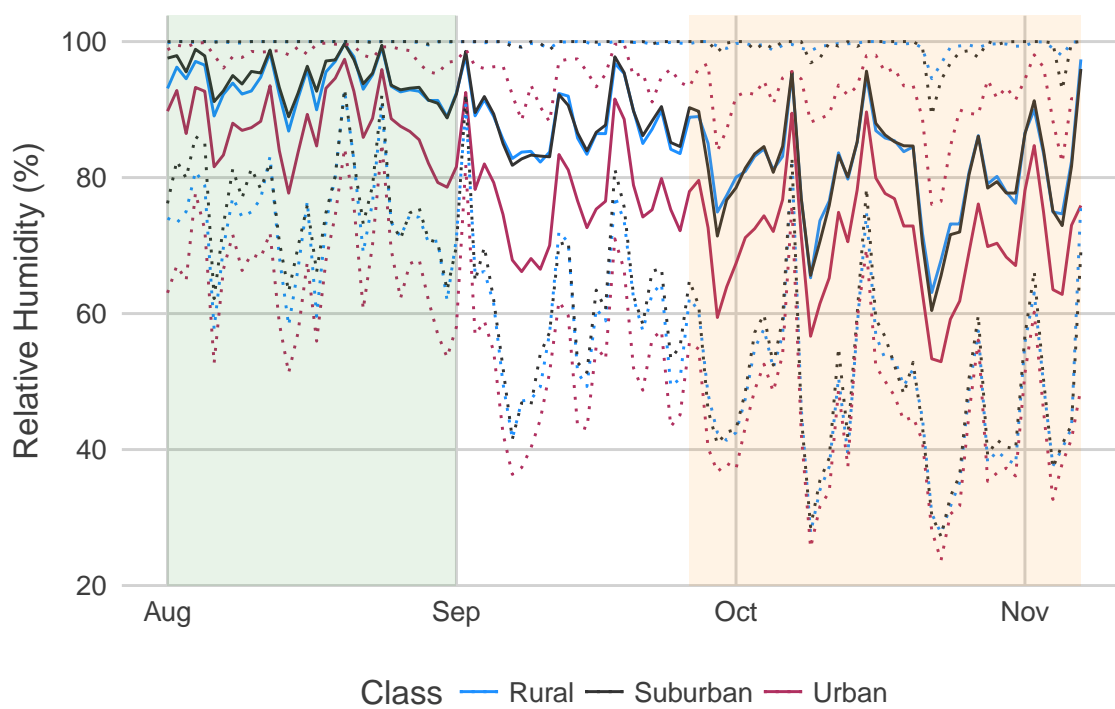

Figure 6: Supplementary Figure 1. Relative humidity across both replicates.

## 672 List of Tables

|     |   |                                                                                           |    |
|-----|---|-------------------------------------------------------------------------------------------|----|
| 673 | 1 | Sources of parameters used in the $VC$ equation. Parameters sourced from Mordecai         |    |
| 674 |   | et al. (2017) were mathematically estimated at a constant temperature of 27 °C.           |    |
| 675 |   | Parameters that included carry-over effects are starred. . . . .                          | 37 |
| 676 | 2 | Relationship between microclimate variables and population and infection dynamics         |    |
| 677 |   | of mosquitoes. Linear mixed effect models were used to determine the effect of tem-       |    |
| 678 |   | perature on survival, development, population growth rate, and vectorial capacity,        |    |
| 679 |   | with site as a random effect, while generalized linear models with logit-link func-       |    |
| 680 |   | tions were used in the calculation of virus dynamics. Conditional $R^2$ values for linear |    |
| 681 |   | mixed models were calculated via Nakagawa and Schielzeth (2013). Superscripts             |    |
| 682 |   | represent significance as calculated by Wald Chi-square tests with Holm-Bonferroni        |    |
| 683 |   | corrections ( $*p < 0.5$ , $**p < 0.01$ , $***p < 0.001$ ). . . . .                       | 38 |
| 684 | 3 | Supplemental Table 1. The efficiency rates of infection (mosquitoes with dengue           |    |
| 685 |   | positive bodies), dissemination (infected mosquitoes with dengue positive heads)          |    |
| 686 |   | and infectiousness (infected mosquitoes with dengue positive saliva) across season        |    |
| 687 |   | and land class. Raw numbers of positive samples are shown with percentages in             |    |
| 688 |   | parentheses. . . . .                                                                      | 39 |
| 689 | 4 | Supplemental Table 2. Chi-square values (subscripts represent degrees of freedom)         |    |
| 690 |   | resulting from linear mixed models analyzing effect of land class and season on           |    |
| 691 |   | microclimate variables. Superscripts represent significance as calculated by Wald         |    |
| 692 |   | Chi-square tests with Holm-Bonferroni corrections ( $*p < 0.5$ , $**p < 0.01$ , $***p <$  |    |
| 693 |   | $0.001$ ). . . . .                                                                        | 40 |

| Parameter    | Definition                                                              | Without carry-over effects | With carry-over effects |
|--------------|-------------------------------------------------------------------------|----------------------------|-------------------------|
| $a(T)$       | Per-mosquito bite rate                                                  | Mordecai et al. 2017       | Mordecai et al. 2017    |
| $b(T)c(T)^*$ | Vector competence                                                       | Mordecai et al. 2017       | Current Study           |
| $\mu(T)$     | Adult mosquito mortality rate                                           | Mordecai et al. 2017       | Mordecai et al. 2017    |
| $EIR(T)$     | Extrinsic incubation rate (i.e. inverse of extrinsic incubation period) | Mordecai et al. 2017       | Mordecai et al. 2017    |
| $EFD(T)^*$   | Number of eggs produced per female mosquito per day                     | Mordecai et al. 2017       | Current Study           |
| $p_{EA}(T)$  | Egg-to-adult survival probability                                       | Current Study              | Current Study           |
| $MDR(T)$     | Mosquito immature development rate                                      | Current Study              | Current Study           |

Table 1: Sources of parameters used in the  $VC$  equation. Parameters sourced from Mordecai et al. (2017) were mathematically estimated at a constant temperature of 27 °C. Parameters that included carry-over effects are starred.

| <b>Response Variable</b>        | $\beta_{Temp}$ | $\beta_{RH}$ | $\beta_{Temp \times RH}$ | $R^2$ |
|---------------------------------|----------------|--------------|--------------------------|-------|
| Survival                        | 2.716***       | -            | -                        | 0.601 |
| Development Rate ( $day^{-1}$ ) | 0.016***       | 0.00382***   | -0.00014***              | 0.743 |
| Per Capita Growth Rate ( $r'$ ) | 0.0127***      | -            | -                        | 0.787 |
| Infection (Body)                | -0.129***      | 0.0376*      | -                        | 0.586 |
| Dissemination (Head)            | -0.0667***     | 0.0160*      | -                        | 0.591 |
| Infectiousness (Saliva)         | -              | 0.0459       | -                        | 0.155 |
| Vectorial Capacity ( $VC$ )     | 0.779***       | -            | -                        | 0.548 |

Table 2: Relationship between microclimate variables and population and infection dynamics of mosquitoes. Linear mixed effect models were used to determine the effect of temperature on survival, development, population growth rate, and vectorial capacity, with site as a random effect, while generalized linear models with logit-link functions were used in the calculation of virus dynamics. Conditional  $R^2$  values for linear mixed models were calculated via Nakagawa and Schielzeth (2013). Superscripts represent significance as calculated by Wald Chi-square tests with Holm-Bonferroni corrections (\* $p < 0.5$ , \*\* $p < 0.01$ , \*\*\* $p < 0.001$ ).

| <b>Season</b> | <b>Land Class</b> | <b>No. tested</b> | <b>No. infected (%)</b> | <b>No. disseminated (%)</b> | <b>No. infectious (%)</b> |
|---------------|-------------------|-------------------|-------------------------|-----------------------------|---------------------------|
| <i>Summer</i> |                   |                   |                         |                             |                           |
|               | Rural             | 56                | 22 (39)                 | 19 (48)                     | 6 (15)                    |
|               | Suburban          | 57                | 32 (56)                 | 26 (81)                     | 10 (31)                   |
|               | Urban             | 51                | 10 (20)                 | 10 (100)                    | 7 (70)                    |
| <i>Fall</i>   |                   |                   |                         |                             |                           |
|               | Rural             | 50                | 32 (64)                 | 30 (94)                     | 3 (9)                     |
|               | Suburban          | 43                | 28 (65)                 | 25 (89)                     | 3 (11)                    |
|               | Urban             | 51                | 10 (20)                 | 10 (100)                    | 7 (70)                    |

Table 3: Supplemental Table 1. The efficiency rates of infection (mosquitoes with dengue positive bodies), dissemination (infected mosquitoes with dengue positive heads) and infectiousness (infected mosquitoes with dengue positive saliva) across season and land class. Raw numbers of positive samples are shown with percentages in parentheses.

|                                             | <b>Min.<br/>Temp.</b> | <b>Mean<br/>Temp.</b> | <b>Max.<br/>Temp.</b> | <b>DTR</b> | <b>Min.<br/>RH</b> | <b>Mean<br/>RH</b> | <b>DHR</b> |
|---------------------------------------------|-----------------------|-----------------------|-----------------------|------------|--------------------|--------------------|------------|
| Land<br>Class<br>( $\chi^2_2$ )             | 12.40**               | 16.16***              | 3.71                  | 8.23*      | 9.93**             | 22.91***           | 0.85       |
| Season<br>( $\chi^2_1$ )                    | 1809.77**             | 1320.55***            | 362.39***             | 549.30***  | 838.43***          | 745.35***          | 755.49***  |
| Land<br>Class x<br>Season<br>( $\chi^2_2$ ) | 6.6*                  | 3.21                  | 1.13                  | 11.79**    | 3.77               | 11.12**            | 28.57***   |

Table 4: Supplemental Table 2. Chi-square values (subscripts represent degrees of freedom) resulting from linear mixed models analyzing effect of land class and season on microclimate variables. Superscripts represent significance as calculated by Wald Chi-square tests with Holm-Bonferroni corrections (\* $p < 0.5$ , \*\* $p < 0.01$ , \*\*\* $p < 0.001$ ).
